# Supplementary material for: Effect of Cannabidiolic Acid, N-Trans-Caffeoyltyramine and Cannabisin B from Hemp Seeds on microRNA Expression in Human Neural Cells
Source: MDPI journal article supplement (doi:10.3390/cimb44100347), 2022-10-21
Supplement: s1 [file s1]

**Supplementary Table S1. Effect of cannabisin B on miRNA expression in neural SH cells**

| <b>miRNA</b>      | <b>mean of<br/>normalized counts</b> | <b>log2 fold change</b> | <b>adjusted p<br/>value</b> |
|-------------------|--------------------------------------|-------------------------|-----------------------------|
| hsa-miR-708-5p    | 653                                  | 4,01                    | 1,38E-118                   |
| hsa-miR-708-3p    | 111                                  | 2,81                    | 3,51E-26                    |
| hsa-miR-1260a     | 9467                                 | 1,61                    | 2,26E-56                    |
| hsa-miR-1260b     | 9475                                 | 1,61                    | 1,41E-57                    |
| hsa-miR-211-5p    | 880                                  | 1,13                    | 1,72E-19                    |
| hsa-miR-542-5p    | 638                                  | 1,12                    | 8,09E-16                    |
| hsa-miR-1843      | 272                                  | 1,08                    | 3,32E-06                    |
| hsa-miR-455-3p    | 19117                                | 1,00                    | 1,76E-21                    |
| hsa-miR-181a-5p   | 32243                                | 1,00                    | 6,25E-25                    |
| hsa-miR-4508      | 117                                  | 0,98                    | 5,24E-03                    |
| hsa-miR-29c-5p    | 122                                  | 0,94                    | 1,74E-04                    |
| hsa-miR-125b-2-3p | 2453                                 | 0,93                    | 1,06E-32                    |
| hsa-miR-671-3p    | 212                                  | 0,88                    | 6,64E-04                    |
| hsa-miR-126-3p    | 537                                  | 0,86                    | 6,79E-13                    |
| hsa-miR-139-5p    | 181                                  | 0,83                    | 5,36E-04                    |
| hsa-miR-320a-3p   | 20799                                | 0,81                    | 1,32E-12                    |
| hsa-miR-320b      | 389                                  | 0,81                    | 3,87E-07                    |
| hsa-miR-146a-5p   | 29016                                | 0,80                    | 2,91E-25                    |
| hsa-miR-500a-3p   | 240                                  | 0,79                    | 7,23E-06                    |
| hsa-miR-320c      | 129                                  | 0,78                    | 7,07E-03                    |
| hsa-miR-34b-3p    | 2242                                 | 0,78                    | 4,65E-16                    |
| hsa-miR-135b-3p   | 255                                  | 0,73                    | 2,94E-03                    |
| hsa-miR-339-3p    | 769                                  | 0,72                    | 3,41E-12                    |
| hsa-miR-150-5p    | 184                                  | 0,69                    | 1,01E-03                    |
| hsa-miR-4510      | 222                                  | 0,65                    | 1,81E-03                    |
| hsa-miR-125a-3p   | 706                                  | 0,64                    | 3,58E-05                    |
| hsa-miR-5100      | 456                                  | 0,63                    | 8,00E-03                    |
| hsa-miR-424-5p    | 3671                                 | -0,59                   | 3,28E-06                    |

|                  |       |       |          |
|------------------|-------|-------|----------|
| hsa-miR-26a-2-3p | 262   | -0,59 | 4,25E-03 |
| hsa-miR-335-5p   | 590   | -0,60 | 9,53E-04 |
| hsa-miR-3065-5p  | 485   | -0,60 | 5,08E-06 |
| hsa-miR-143-3p   | 960   | -0,60 | 7,43E-05 |
| hsa-miR-101-3p   | 7304  | -0,61 | 2,00E-09 |
| hsa-miR-874-3p   | 405   | -0,62 | 2,87E-03 |
| hsa-miR-98-3p    | 222   | -0,62 | 5,86E-03 |
| hsa-miR-107      | 4329  | -0,62 | 5,99E-11 |
| hsa-miR-363-3p   | 566   | -0,63 | 1,80E-05 |
| hsa-let-7a-3p    | 2254  | -0,65 | 4,74E-09 |
| hsa-miR-199b-3p  | 24702 | -0,65 | 9,27E-11 |
| hsa-miR-17-5p    | 3605  | -0,66 | 2,15E-08 |
| hsa-miR-199a-3p  | 24888 | -0,66 | 8,03E-11 |
| hsa-miR-532-5p   | 2406  | -0,70 | 1,36E-10 |
| hsa-miR-15a-5p   | 2556  | -0,74 | 3,04E-06 |
| hsa-let-7f-1-3p  | 255   | -0,74 | 2,40E-04 |
| hsa-miR-193b-3p  | 169   | -0,82 | 6,74E-03 |
| hsa-miR-15b-5p   | 25706 | -0,85 | 1,17E-17 |
| hsa-miR-20a-5p   | 2993  | -0,86 | 5,55E-12 |
| hsa-miR-362-3p   | 449   | -0,89 | 1,03E-07 |
| hsa-miR-15b-3p   | 1629  | -0,90 | 6,19E-14 |
| hsa-miR-449a     | 664   | -0,93 | 2,27E-12 |
| hsa-miR-301a-3p  | 345   | -0,93 | 1,97E-04 |
| hsa-miR-7-5p     | 9260  | -0,95 | 4,00E-14 |
| hsa-miR-106b-5p  | 7756  | -1,08 | 3,63E-26 |
| hsa-miR-21-3p    | 661   | -1,12 | 8,76E-12 |
| hsa-miR-542-3p   | 3553  | -1,13 | 2,95E-19 |
| hsa-miR-19b-3p   | 660   | -1,13 | 3,78E-10 |
| hsa-miR-301a-5p  | 268   | -1,15 | 6,07E-12 |
| hsa-miR-199a-5p  | 1028  | -1,18 | 3,97E-28 |
| hsa-miR-199b-5p  | 993   | -1,20 | 7,85E-29 |
| hsa-miR-18a-5p   | 517   | -1,20 | 2,10E-17 |

|                 |      |       |          |
|-----------------|------|-------|----------|
| hsa-miR-190b-5p | 123  | -1,25 | 5,43E-05 |
| hsa-miR-362-5p  | 1225 | -1,33 | 4,33E-24 |
| hsa-miR-760     | 459  | -1,39 | 2,12E-08 |
| hsa-miR-335-3p  | 118  | -1,42 | 6,60E-09 |
| hsa-miR-16-2-3p | 221  | -1,55 | 3,87E-18 |
| hsa-miR-503-5p  | 4633 | -1,82 | 8,17E-37 |
| hsa-miR-340-5p  | 6167 | -1,83 | 4,60E-62 |
| hsa-miR-190a-5p | 718  | -2,00 | 4,98E-34 |

Selection was limited to those microRNAs showing normalized counts  $\geq 100$ , absolute value of log2 fold change  $\geq 0.59$ , and Benjamini-Hochberg adjusted p value  $< 0.01$ .

**Supplementary Table S2. Effect of *N-trans*-caffeoyltyramine on miRNA expression in neural SH cells**

| <b>miRNA</b>    | <b>mean of<br/>normalized counts</b> | <b>log2 fold<br/>change</b> | <b>adjusted p value</b> |
|-----------------|--------------------------------------|-----------------------------|-------------------------|
| hsa-miR-708-5p  | 653                                  | 3,23                        | 4,57E-76                |
| hsa-miR-708-3p  | 111                                  | 2,29                        | 3,25E-17                |
| hsa-miR-135b-3p | 255                                  | 1,54                        | 1,31E-11                |
| hsa-miR-139-5p  | 181                                  | 1,42                        | 3,12E-10                |
| hsa-miR-4508    | 117                                  | 1,29                        | 1,56E-04                |
| hsa-miR-194-5p  | 578                                  | 0,89                        | 3,85E-09                |
| hsa-miR-500a-3p | 240                                  | 0,86                        | 6,59E-07                |
| hsa-miR-1249-3p | 1125                                 | 0,85                        | 1,15E-07                |
| hsa-miR-211-5p  | 880                                  | 0,81                        | 3,68E-10                |
| hsa-miR-181a-5p | 32260                                | 0,8                         | 3,53E-16                |
| hsa-miR-192-5p  | 799                                  | 0,8                         | 1,59E-11                |
| hsa-miR-455-3p  | 19117                                | 0,75                        | 2,91E-12                |
| hsa-miR-132-3p  | 451                                  | 0,75                        | 1,08E-06                |
| hsa-miR-150-5p  | 184                                  | 0,74                        | 4,13E-04                |
| hsa-miR-339-3p  | 769                                  | 0,69                        | 2,43E-11                |
| hsa-miR-320b    | 410                                  | 0,68                        | 2,82E-05                |
| hsa-miR-542-5p  | 638                                  | 0,67                        | 4,09E-06                |
| hsa-miR-200c-3p | 181                                  | 0,67                        | 4,71E-03                |
| hsa-miR-502-3p  | 318                                  | 0,66                        | 4,22E-05                |
| hsa-miR-320a-3p | 20799                                | 0,65                        | 2,57E-08                |
| hsa-miR-135b-5p | 37964                                | 0,6                         | 3,37E-11                |
| hsa-miR-23c     | 262                                  | 0,6                         | 6,45E-04                |
| hsa-miR-449°    | 664                                  | -0,6                        | 7,68E-06                |
| hsa-let-7a-3p   | 2241                                 | -0,62                       | 2,34E-08                |
| hsa-miR-20a-5p  | 2993                                 | -0,62                       | 1,40E-06                |
| hsa-miR-218-5p  | 11811                                | -0,63                       | 3,67E-22                |
| hsa-miR-16-2-3p | 221                                  | -0,64                       | 2,60E-04                |
| hsa-miR-378a-3p | 9224                                 | -0,66                       | 2,39E-28                |

|                   |       |       |          |
|-------------------|-------|-------|----------|
| hsa-miR-106a-5p   | 449   | -0,66 | 4,13E-04 |
| hsa-miR-17-5p     | 3605  | -0,67 | 1,33E-08 |
| hsa-miR-125b-1-3p | 6965  | -0,72 | 6,11E-08 |
| hsa-miR-222-5p    | 390   | -0,72 | 1,67E-04 |
| hsa-miR-340-5p    | 6167  | -0,74 | 8,32E-11 |
| hsa-miR-362-3p    | 449   | -0,74 | 1,24E-05 |
| hsa-miR-92b-3p    | 1848  | -0,79 | 2,05E-10 |
| hsa-miR-424-5p    | 3671  | -0,84 | 1,60E-11 |
| hsa-miR-18a-5p    | 517   | -0,85 | 2,11E-09 |
| hsa-miR-143-3p    | 960   | -0,87 | 5,52E-09 |
| hsa-miR-874-3p    | 405   | -0,9  | 9,21E-06 |
| hsa-miR-450a-5p   | 18778 | -0,91 | 4,20E-29 |
| hsa-miR-335-3p    | 118   | -0,96 | 7,72E-05 |
| hsa-miR-450a-1-3p | 100   | -0,97 | 1,29E-03 |
| hsa-miR-199b-5p   | 993   | -0,99 | 1,46E-20 |
| hsa-miR-199a-5p   | 1029  | -1    | 1,72E-20 |
| hsa-miR-363-3p    | 566   | -1,05 | 3,01E-13 |
| hsa-miR-362-5p    | 1225  | -1,11 | 4,85E-17 |
| hsa-miR-19b-3p    | 624   | -1,15 | 1,82E-09 |
| hsa-miR-26a-2-3p  | 262   | -1,17 | 4,54E-09 |
| hsa-miR-190a-5p   | 718   | -1,21 | 1,40E-13 |
| hsa-miR-542-3p    | 3553  | -1,32 | 1,13E-25 |
| hsa-miR-503-5p    | 4633  | -1,82 | 1,98E-36 |

Selection was limited to those microRNAs showing normalized counts  $\geq 100$ , absolute value of log2 fold change  $\geq 0.59$ , and Benjamini-Hochberg adjusted p value  $< 0.01$ .

**Supplementary Table S3. Effect of cannabidiolic acid on miRNA expression in neural SH cells**

| <b>miRNA</b>    | <b>mean of normalized counts</b> | <b>log2 fold change</b> | <b>adjusted p value</b> |
|-----------------|----------------------------------|-------------------------|-------------------------|
| hsa-miR-139-5p  | 181                              | 1,26                    | 7,60E-08                |
| hsa-miR-24-1-5p | 491                              | 0,80                    | 1,73E-06                |
| hsa-miR-211-5p  | 880                              | 0,73                    | 4,38E-08                |
| hsa-miR-181b-5p | 11293                            | 0,67                    | 2,94E-13                |
| hsa-miR-101-3p  | 7219                             | -0,59                   | 2,83E-08                |
| hsa-miR-92b-3p  | 1848                             | -0,60                   | 4,60E-06                |
| hsa-miR-378a-5p | 253                              | -0,61                   | 4,99E-03                |
| hsa-miR-450a-5p | 18778                            | -0,65                   | 1,52E-14                |
| hsa-miR-362-5p  | 1225                             | -0,66                   | 2,60E-06                |
| hsa-miR-378c    | 291                              | -0,67                   | 9,39E-04                |
| hsa-miR-18a-5p  | 517                              | -0,68                   | 4,05E-06                |
| hsa-miR-378a-3p | 9224                             | -0,69                   | 4,24E-30                |
| hsa-miR-20a-5p  | 2993                             | -0,75                   | 7,21E-09                |
| hsa-miR-362-3p  | 449                              | -0,75                   | 1,55E-05                |
| hsa-miR-542-3p  | 3553                             | -0,75                   | 1,53E-08                |
| hsa-miR-503-5p  | 4633                             | -0,81                   | 1,07E-07                |
| hsa-miR-199a-5p | 1029                             | -0,82                   | 7,62E-14                |
| hsa-miR-199b-5p | 993                              | -0,84                   | 1,52E-14                |
| hsa-miR-19b-3p  | 660                              | -0,84                   | 1,08E-05                |
| hsa-miR-143-3p  | 960                              | -1,03                   | 7,01E-12                |
| hsa-miR-190a-5p | 718                              | -1,11                   | 2,91E-11                |

Selection was limited to those microRNAs showing normalized counts  $\geq 100$ , absolute value of log2 fold change  $\geq 0.59$ , and Benjamini-Hochberg adjusted p value  $< 0.01$ .
